# Supplementary material
Source: JCI journal article supplement (doi:10.1172/jci191905)

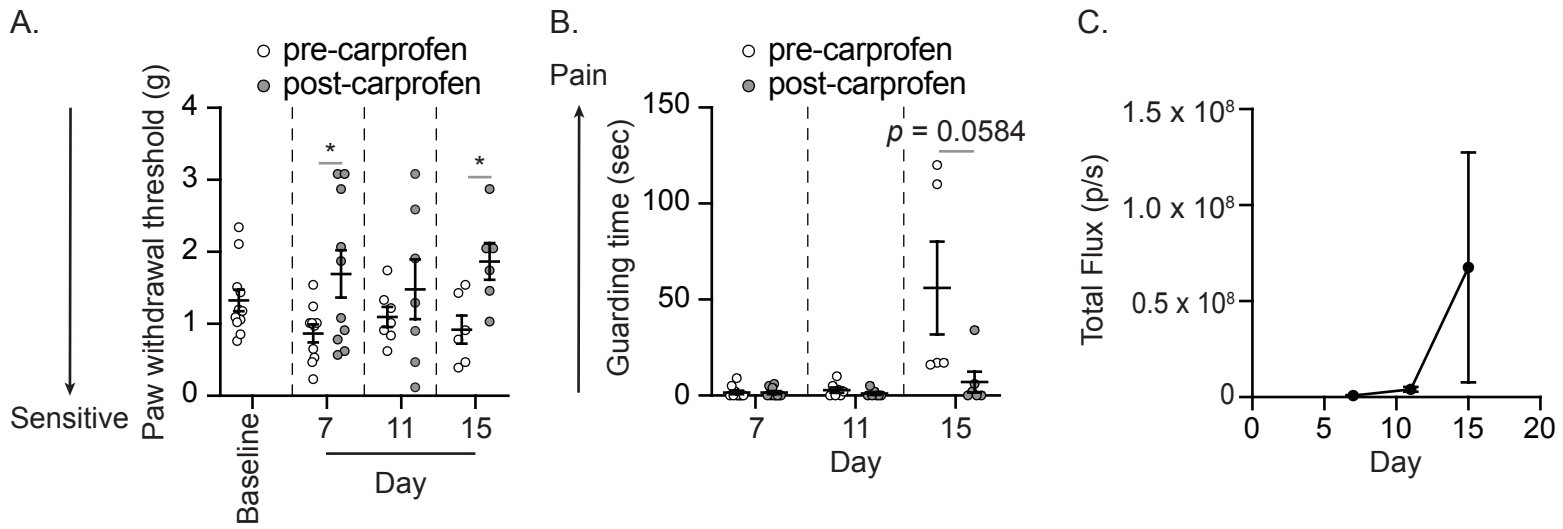

Figure S1

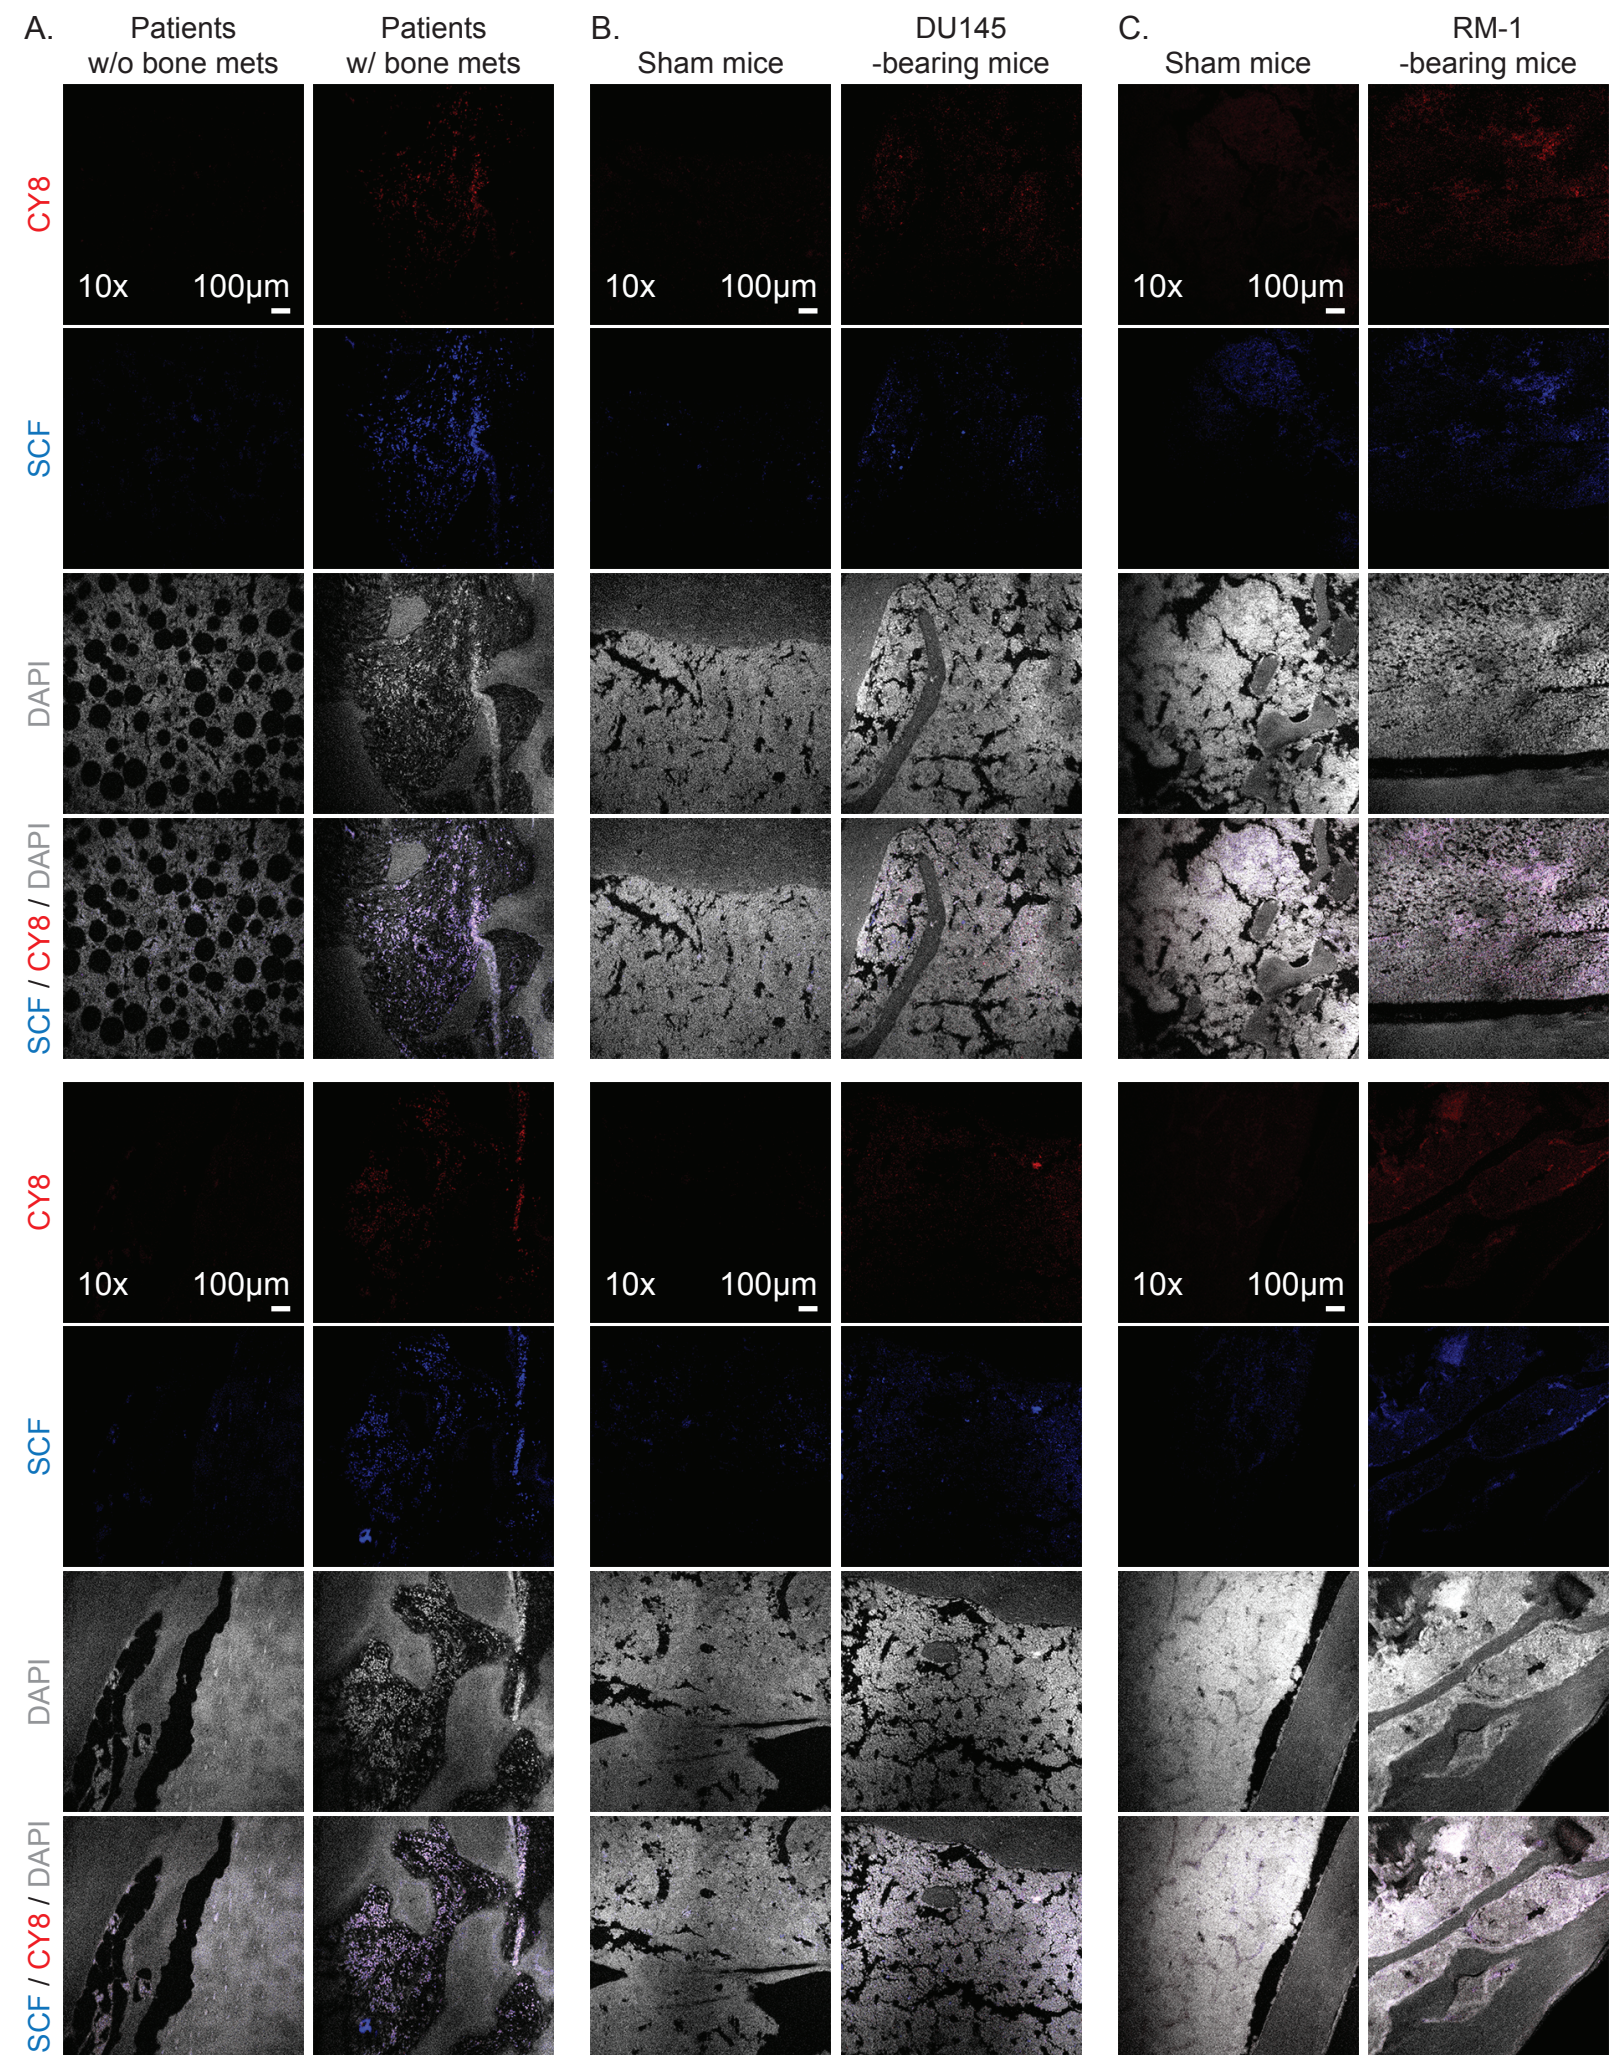

Figure S2

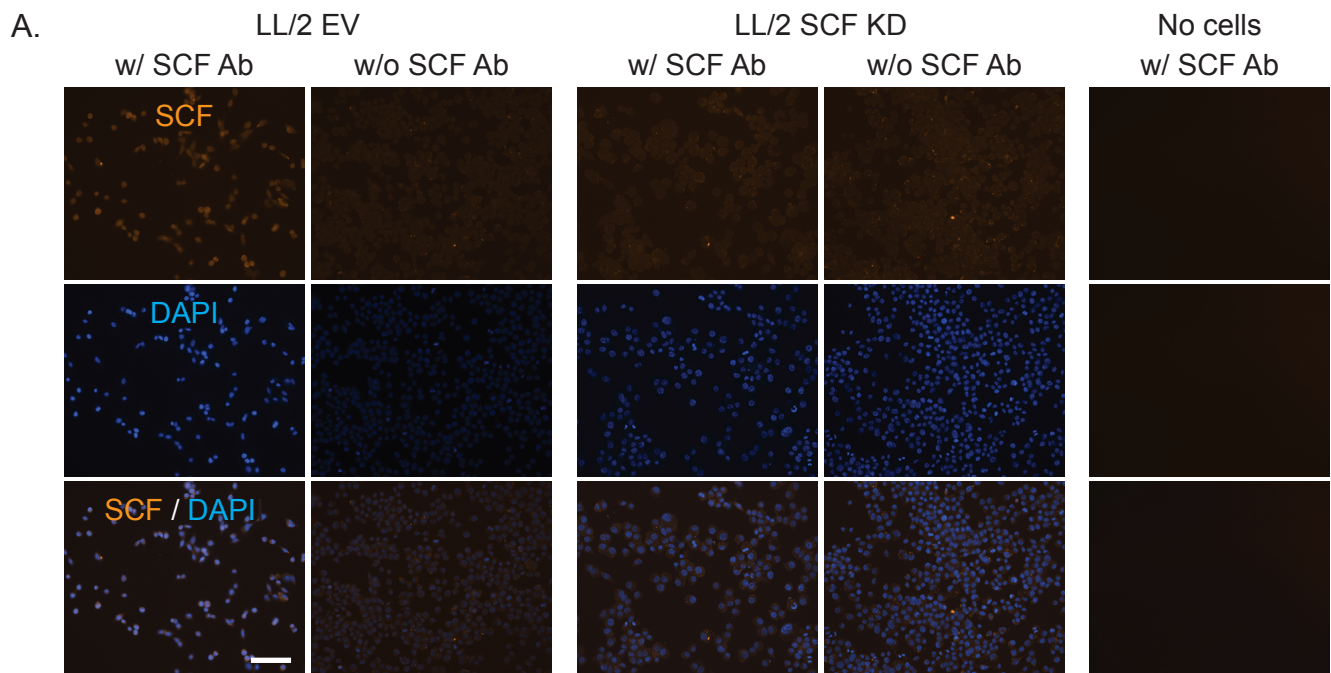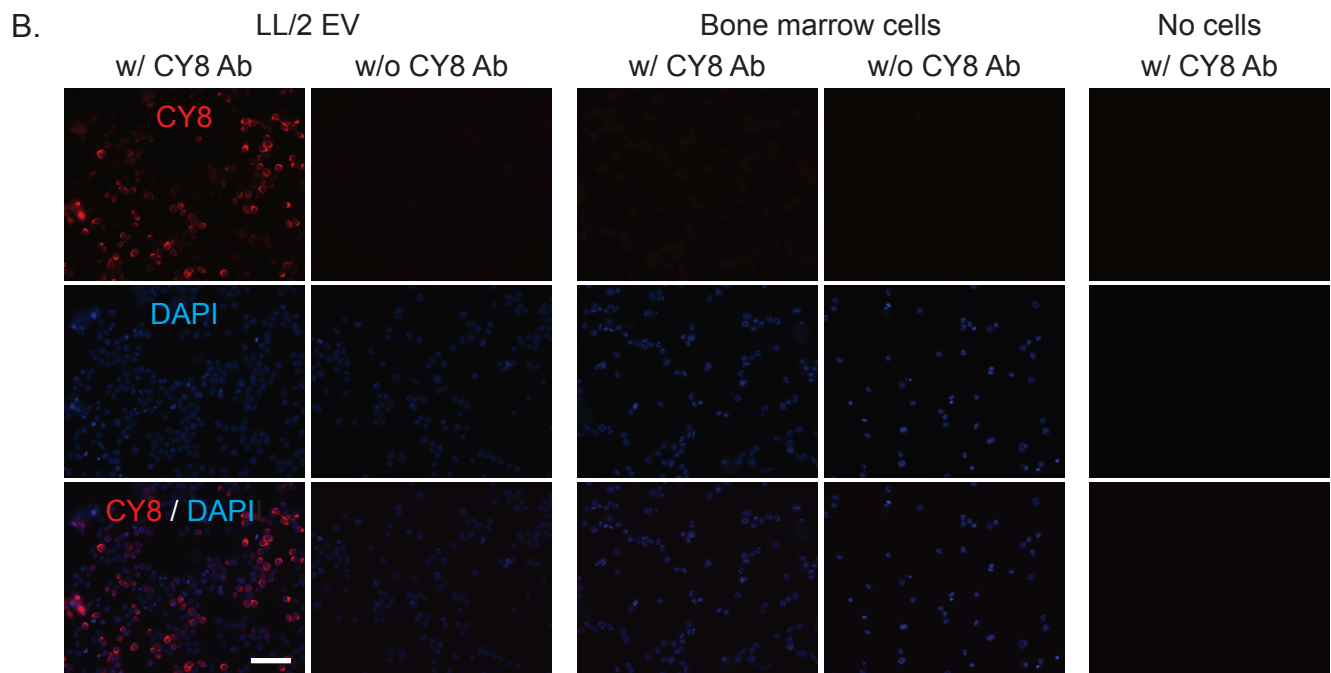

Figure S3

Supplement: sd2 [file 2]
